# Supplementary material
Source: PubMed Central journal article supplement (PMC2710625)
Supplement: 0905165106_0905165106SI.pdf [file 0905165106_0905165106SI.pdf]

# Supporting Information

Yu et al. 10.1073/pnas.0905165106

## SI Experimental Procedures

**Materials.** Peptides were synthesized in a 96-well format using a MultiPep from Intavis Bioanalytical Instruments AG. Preloaded NovaSyn Tentagel resins and fluorenylmethoxycarbonyl-derivatized phosphoamino acid monomers were from Novabiochem. Heavy-isotope phosphopeptides were synthesized at 2- $\mu$ mol scale and contained one residue of L-Pro-N-Fmoc (U-13C5, 97–99%; 15N, 97–99%) (CNLM-4347, Cambridge Isotope Laboratories). Normal-isotope peptides were made at 5- $\mu$ mol scale. Amino acids activated in situ with 1-H-benzotriazolium, 1-[bis(dimethylamino)methylene]-hexafluorophosphate (1-),3-oxide:1-hydroxybenzotriazole hydrate and 4-methylmorpholine were coupled at a 5-fold molar excess over peptide. Each coupling cycle was followed by capping with acetic anhydride to avoid accumulation of 1-residue deletion peptide byproducts. After synthesis, peptide-resins were treated with a standard scavenger-containing trifluoroacetic acid-water cleavage solution, and the peptides were precipitated by addition to cold ether. Peptides were purified by semipreparative HPLC separation and quantified with 2,4,6-trinitrobenzenesulphonic acid (1).

Antibodies against the following proteins were used for Western blot analysis: phospho-RSK (Thr-359/Ser-363), RSK, Akt, phospho-Akt (Ser-473), ERK1/2, phospho-S6 (Ser-235/236), phospho-PI3K regulatory subunit p85(Tyr-467)/p55(Tyr-199), actin, histone H3, Src, phospho-Src (Tyr-416), EGFR, phosphotyrosine(*p*-Tyr-100), phospho-threonine-proline (*p*-Thr-Pro-101) (Cell Signaling Technology), phospho-ERK1/2 (Thr-202/Tyr-204) (Sigma), PI3 kinase regulatory subunit p55 $\gamma$  (Santa Cruz Biotechnology), pan-PI3 kinase regulatory subunit p85 (Millipore), and PI3 kinase catalytic subunit p110 $\alpha$  (BD Biosciences). UO126 and wortmannin were obtained from Sigma and SU6656 was purchased from Calbiochem. Recombinant Akt1, RSK1, Src, and EGFR were purchased from Cell Signaling Technology.

**Cell Culture, Transfection, and Lysis.** HEK293 cells were maintained in Dulbecco's modified Eagle's medium (DMEM) supplemented with 10% FBS (FBS). For cell lysis, the media were removed, and cells were washed with ice-cold PBS and lysed with ice-cold LB lysis buffer (10 mM K<sub>2</sub>HPO<sub>4</sub> pH 7.5, 1 mM EDTA, 10 mM MgCl<sub>2</sub>, 50 mM  $\beta$ -glycerophosphate, 5 mM EGTA, 0.5% Nonidet P-40, 0.1% Brij 35, 0.1% deoxycholic acid, 1 mM sodium orthovanadate, 1 mM phenylmethyl-sulfonyl fluoride, 5  $\mu$ g/ml leupeptin and 5  $\mu$ g/ml pepstatin A). Lysates were centrifuged at 10,000  $\times$  *g* for 10 min to remove cell debris, and clear supernatant was used for immunoblot and in vitro kinase assays. Protein concentration was determined by Bradford assay (Bio-Rad).

After a 16-h starvation period, HEK293 cells were treated with insulin (100 nM, 10 min), EGF (50 ng/ml, 5 min), or PMA (50 ng/ml, 10 min) at 37 °C for the indicated times. For drug inhibition studies, cells were pretreated with UO126 (5  $\mu$ M) or wortmannin (100 nM) for 30 min before mitogen stimulation. For the small interfering RNA (siRNA) studies, 21 nucleotide complementary RNA with symmetrical 2 nucleotide overhangs were obtained from Qiagen. The DNA sequences against which double-stranded RNAs for RSK1 and RSK2 were created were CCCAACATCATCACTCTGAAA and AGCGCTGAGAATGGACAGCAA, respectively. HEK293 cells were transfected using the calcium-phosphate procedure using 1 to 2  $\mu$ g each siRNA per 100-mm dishes. Transfection efficiency was determined to be greater than 95% using a fluorescently labeled mock

siRNA. Twenty-four hours following transfection, cells were serum-starved for 16 to 18 h, stimulated with EGF, and then harvested. The lysates were centrifuged for 10 min at 4 °C, and immunoblotted as shown.

For preparation of cell lysates in cell-cycle experiments, thymidine stock solution was added to HeLa cells at final concentration of 2.5 mM for 19 h. Cells were then washed with 25 ml PBS 3 times and released in growth media for 9 h. Then, thymidine stock was applied to the cells again for another 16-h culture. After double thymidine block, half of the G1/S cells were harvested and stored for later use, the other half was washed with PBS 3 times and immediately released into nocodazole containing light media at a final concentration of 0.2  $\mu$ g/ml until 90% of cells were rounded up. G2/M cells were collected by mitotic shake-off.

**Cell Culture of Breast Cancer Cell Lines.** MCF7 and MBA-MB231 cells were maintained in DMEM supplemented with 10% FBS. Sum159 cells were maintained in Ham's F12 media supplemented with 5% FBS, 5- $\mu$ g/ml insulin and 1- $\mu$ g/ml hydrocortisone. MCF10A, MCF10A/ErbB2, MCF10A/IGFR, and MCF10A/H-Ras<sup>G12V</sup> cells were generously provided by J. Brugge (2–4) and were maintained in 50/50 DMEM/F12 media supplemented with 5% horse serum, 20 ng/ml EGF, 100 ng/ml cholera toxin, 10  $\mu$ g/ml insulin, and 500 ng/ml hydrocortisone. Breast cancer cells were also treated with 1  $\mu$ M of gefitinib (LC laboratories) for 24 h before lysis and KAYAK analysis. The mutation data (Fig. 6A) was obtained from the Wellcome Trust Sanger Institute Cancer Genome Project Web site, <http://www.sanger.ac.uk/genetics/CGP> and ref. 5.

**Western Blot.** Lysates were resolved on 4 to 12% SDS/PAGE, transferred onto Protran membranes (Whatman), blocked with 3% milk in TBST, incubated with a 1:1,000 dilution of primary antibody at 4 °C overnight, washed, and incubated with a 1:5,000 dilution of secondary antibody (HRP-conjugated) in 3% milk in TBST for 1 h at room temperature. Bands were visualized with ECL solutions (6).

**Sample Preparation, MS Analysis, and Kinase Activity Quantitation.** All reactions were performed using 6- $\mu$ g cell lysate (unless otherwise noted). Each lysate aliquot was mixed to a final volume of 20  $\mu$ l containing 25 mM Tris pH 7.5, 5 mM ATP, 100  $\mu$ M peptide substrate, 7.5 mM MgCl<sub>2</sub>, 0.15 mM EGTA, 7.5 mM  $\beta$ -glycerol phosphate, 0.1 mM sodium orthovanadate, 0.1 mM DTT. The reaction was incubated at 25 °C for 60 min and then terminated by the addition of 100  $\mu$ l of 1% trifluoroacetic acid containing a known amount of ISTD (typically 20 pmol). Forty-five individual in vitro kinase reaction mixtures were combined and desalted by using Sep-Pak C18 cartridges (Waters). Phosphopeptides were enriched by immobilized metal ion chromatography with 20  $\mu$ l of beads (Phos-Select iron affinity gel, Sigma) and subsequently desalted by using Empore C18 solid phase extraction disks (3M) as described previously (7).

Samples were analyzed with an LTQ-FT or LTQ-orbitrap mass spectrometer (ThermoFisher) using LC-MS conditions described previously (7). Briefly, peptides were separated on a hand-pulled fused silica microcapillary (125  $\mu$ M  $\times$  15 cm, packed with Magic C18AQ, Michrom Bioresources) using a 45-min linear gradient ranging from 10% to 37% acetonitrile in 0.1% formic acid. For each cycle, one full, high-resolution MS scan was acquired (10<sup>6</sup> ion AGC setting), followed by two

MS/MS scans in the linear ion trap. MS/MS experiments were performed for phosphorylation site localization.

Quantification of the target peptide-internal standard ratios was performed by first constructing the extracted ion chromatogram for the most abundant charge state for each peptide using a  $\pm 10$ -ppm window around the monoisotopic peak. Chromatograms were integrated using Qual/Quan browser (Xcalibur 2.0.5,

Thermo Fisher). Because the phosphorylated peptides generated from the in vitro kinase reactions were chemically identical to the internal standards, they were assumed to have the same ionization efficiency. Therefore, the amount of each phosphorylated peptide was calculated by direct ratio to the internal standard level.

1. Fields R (1971) The measurement of amino groups in proteins and peptides. *Biochem J* 124:581–590.
2. Debnath J, et al. (2002) The role of apoptosis in creating and maintaining luminal space within normal and oncogene-expressing mammary acini. *Cell* 111:29–40.
3. Irie HY, et al. (2005) Distinct roles of Akt1 and Akt2 in regulating cell migration and epithelial-mesenchymal transition. *J Cell Biol* 171:1023–1034.
4. Reginato MJ, et al. (2003) Integrins and EGFR coordinately regulate the pro-apoptotic protein Bim to prevent anoikis. *Nat Cell Biol* 5:733–740.
5. Hollestelle A, et al. (2007) Phosphatidylinositol-3-OH kinase or RAS pathway mutations in human breast cancer cell lines. *Mol Cancer Res* 5:195–201.
6. Roux PP, et al. (2004) Tumor-promoting phorbol esters and activated Ras inactivate the tuberous sclerosis tumor suppressor complex via p90 ribosomal S6 kinase. *Proc Natl Acad Sci USA* 101:13489–13494.
7. Villen J, Beausoleil SA, Gerber SA, Gygi SP (2007) Large-scale phosphorylation analysis of mouse liver. *Proc Natl Acad Sci USA* 104:1488–1493.
8. Beausoleil SA, et al. (2006) A probability-based approach for high-throughput protein phosphorylation analysis and site localization. *Nat Biotechnol* 24:1285–1292.
9. Huang CH, et al. (2007) The structure of a human p110alpha/p85alpha complex elucidates the effects of oncogenic PI3Kalpha mutations. *Science* 318:1744–1748.

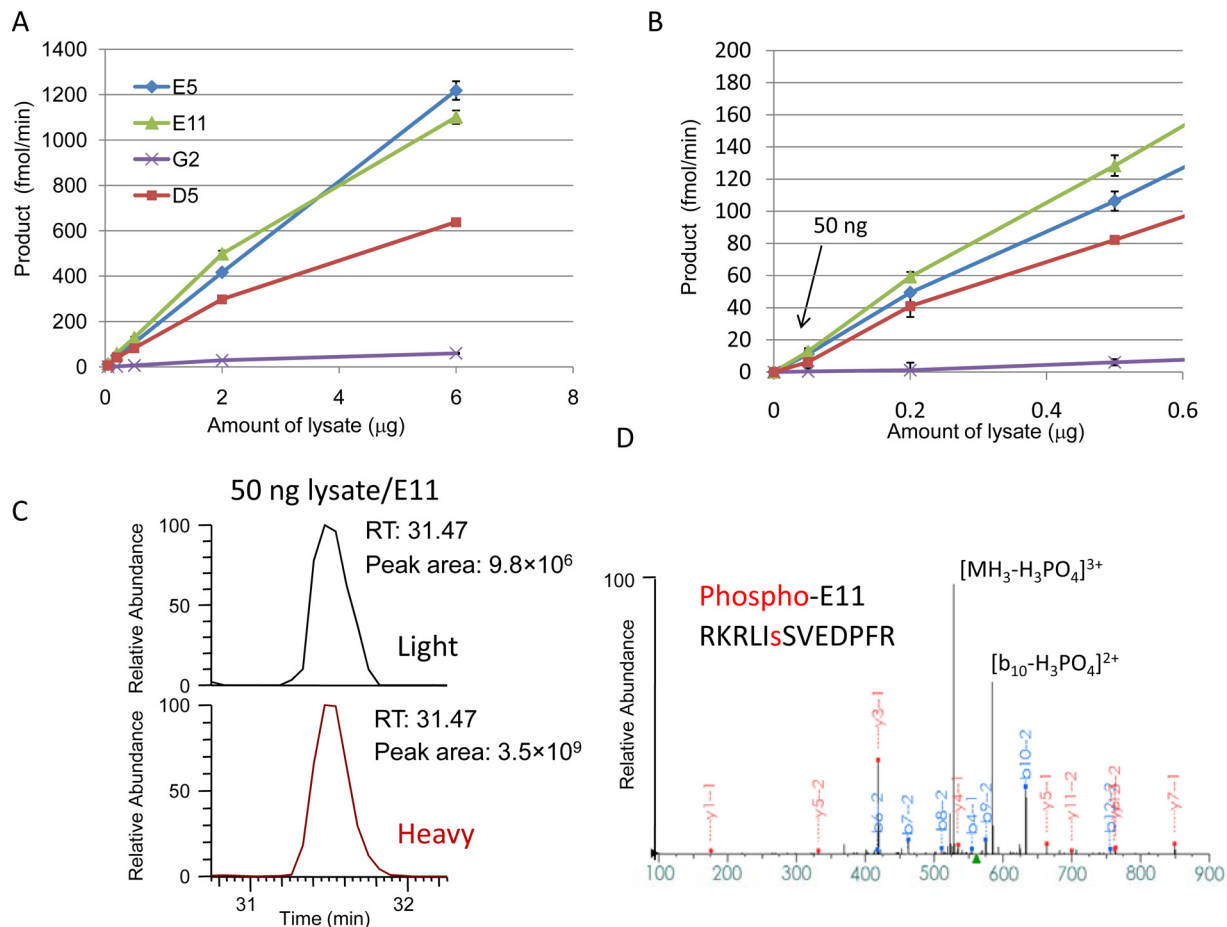

**Fig. S1.** Linearity and sensitivity of the KAYAK method. (A) Activities toward several representative peptides were measured using from 50-ng to 6- $\mu\text{g}$  lysate of insulin-stimulated HEK293 cells. The KAYAK assay was performed using varying amount of cell lysate but constant substrate concentration (100  $\mu\text{M}$ ) and reaction time (1 h). Substrate peptide responses were linear across all lysate levels. (B) Expanded view of the low-end region. (C) One representative extracted ion chromatogram of the light and heavy phospho-E11 peptide using 50 ng of the lysate. A  $\pm 10$ -ppm mass tolerance around the monoisotopic peak was used. Retention time (RT) and area under the curve are shown. No signal was detected for the light peptide at the zero time point. The amount of phosphorylated peptide formed was calculated to be 770 fmol, which is still 100 times above the limit of quantification for nanoscale chromatography coupled to high-resolution MS ( $\approx 1$  fmol). (D) MS/MS spectrum of the light phosphorylated E11 peptide. Sequence was determined to be RKRLI<sub>s</sub>SVEDPFR.

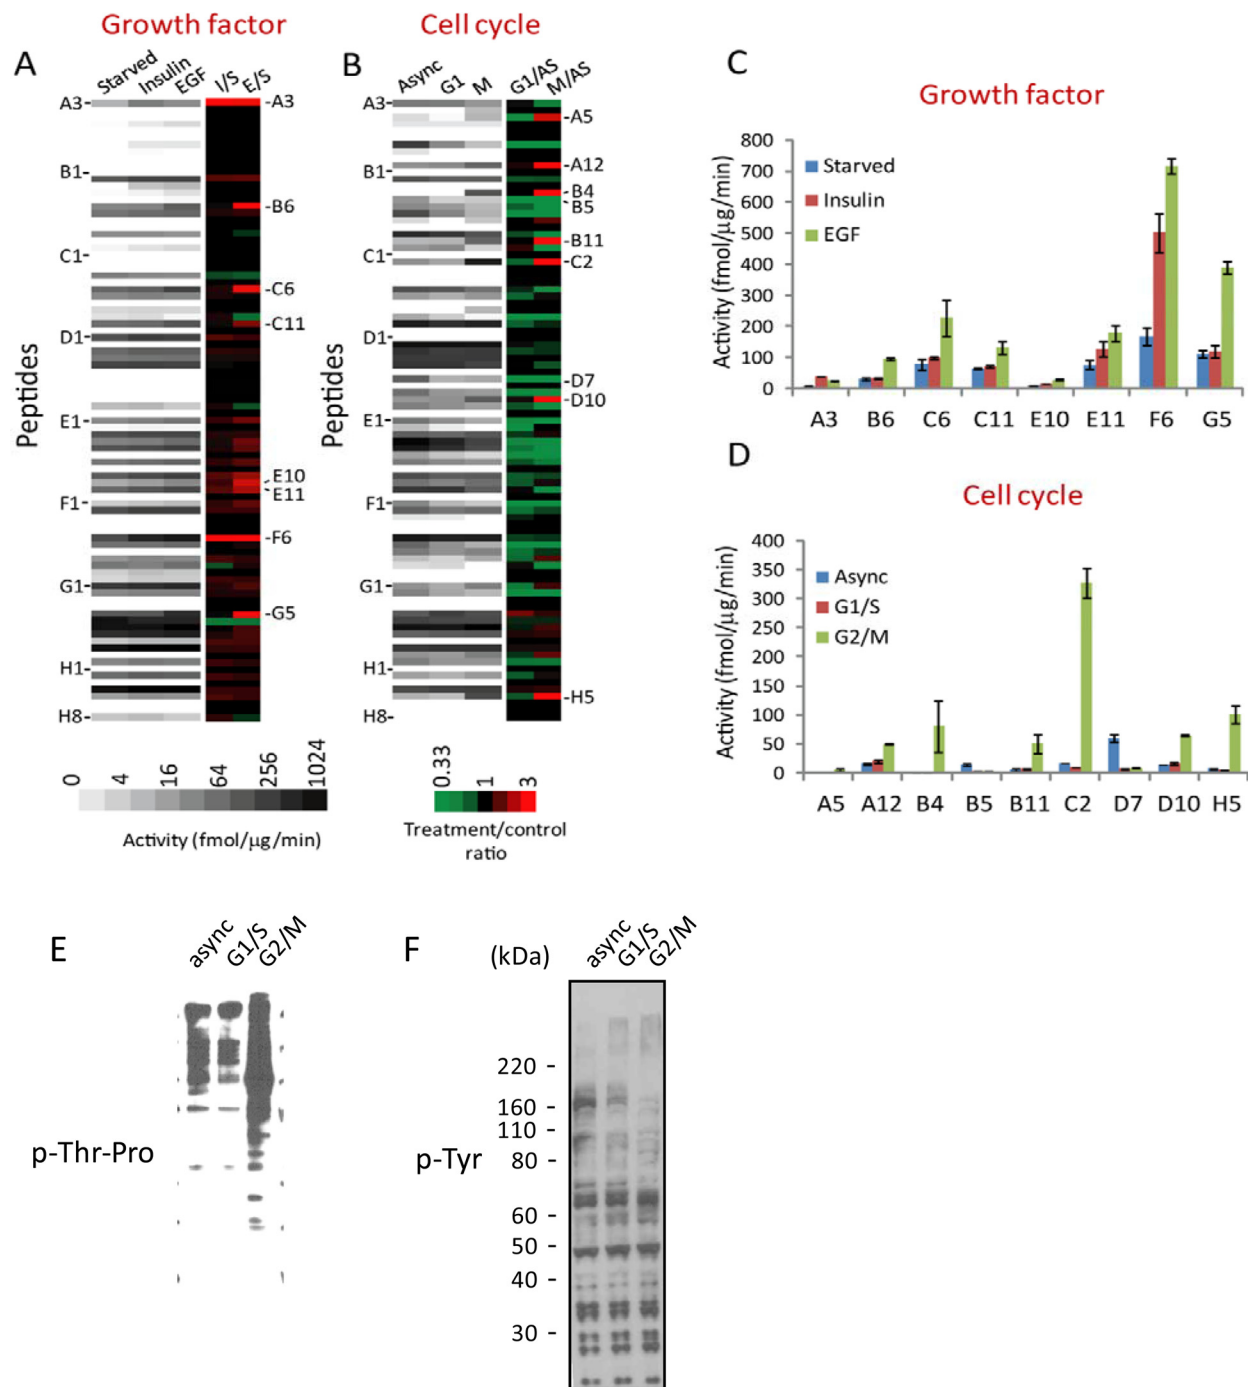

**Fig. S2.** Peptide phosphorylation rates accurately report pathway activation states. (A) Intensity map of kinase activities of starved (S), insulin-stimulated (I) and EGF-stimulated (E) HEK293 cells (average of triplicate experiments). Fold change over the starved state is also shown. Peptides with signals below detection threshold were not included for ratio calculation. (B) Intensity map of kinase activities of asynchronously growing (AS) HeLa cells, and cells arrested in either G1/S or G2/M phase of the cell cycle. Fold change over the asynchronous state is also shown. Peptides were ordered according to their positions in the 96-well plate. (C) Peptides with altered phosphorylation rates after insulin or EGF stimulation from 3 separate experiments. (D) Peptides with altered phosphorylation activities during cell cycle. Sequences of all peptides can be found in [Table S1](#). (E) Immunoblotting analysis of lysates of asynchronously growing HeLa cells and cells arrested in G1/S and G2/M phase using a general antiphospho-threonine-proline motif antibody. Proline-directed phosphorylation increased in G2/M. (F) Immunoblot analysis of lysates of asynchronously growing HeLa cells and cells arrested in G1/S and G2/M phase using a general anti-phospho-tyrosine antibody.

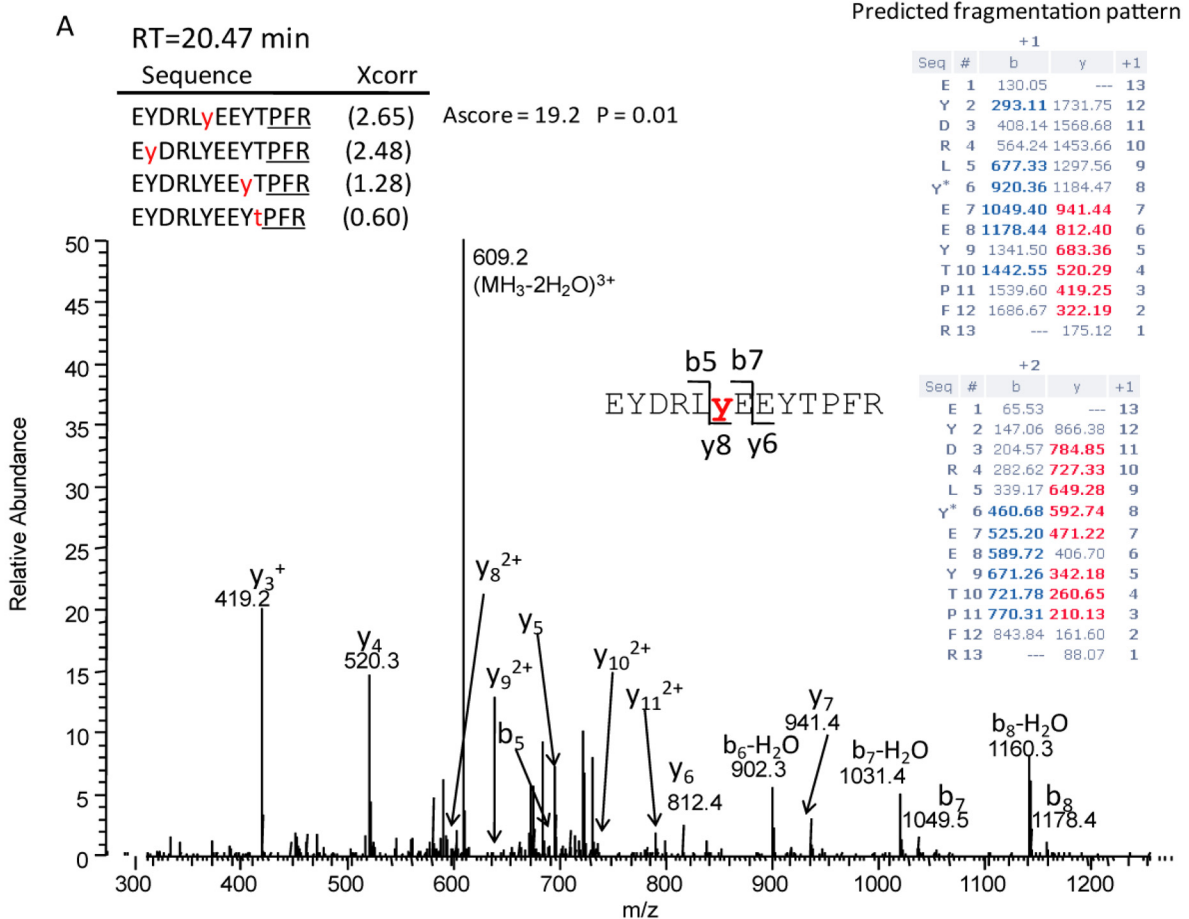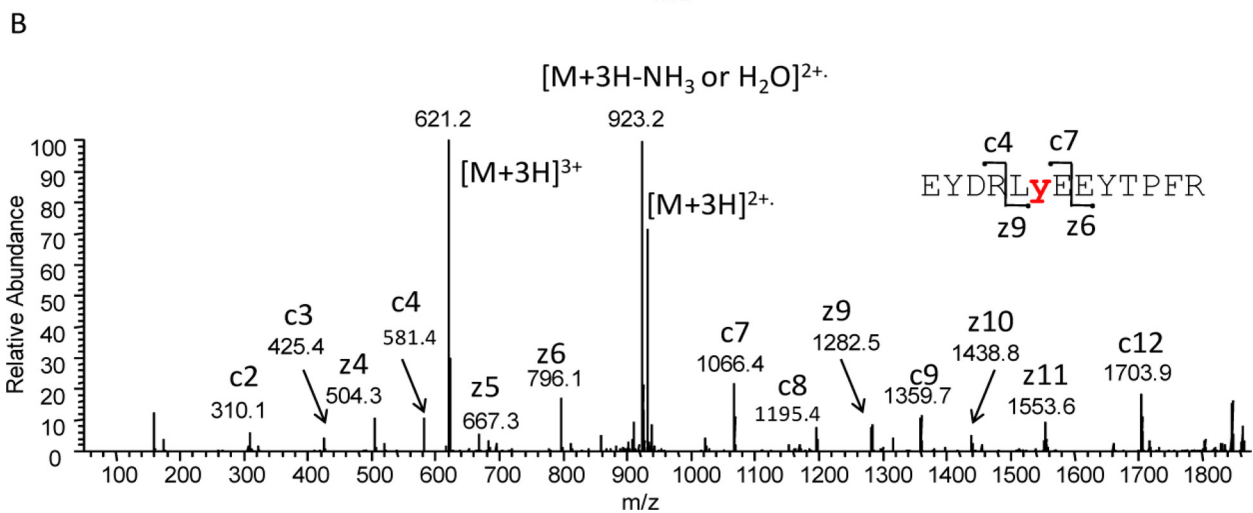

**Fig. S3.** Phosphate localization of the H5 peptide. (A) H5 peptide was phosphorylated using nocodazole arrested HeLa cell lysate and phospho-H5 was subjected to collision-induced dissociation MS/MS analysis. The correct phosphorylation site was localized with an Ascore (8) of 19.2 ( $P = 0.01$ ). (B) electron transfer dissociation MS/MS spectrum of the phospho-H5 peptide. Site-determining ions for the designated sequence (EYDRLyEEYTPFR) are shown.



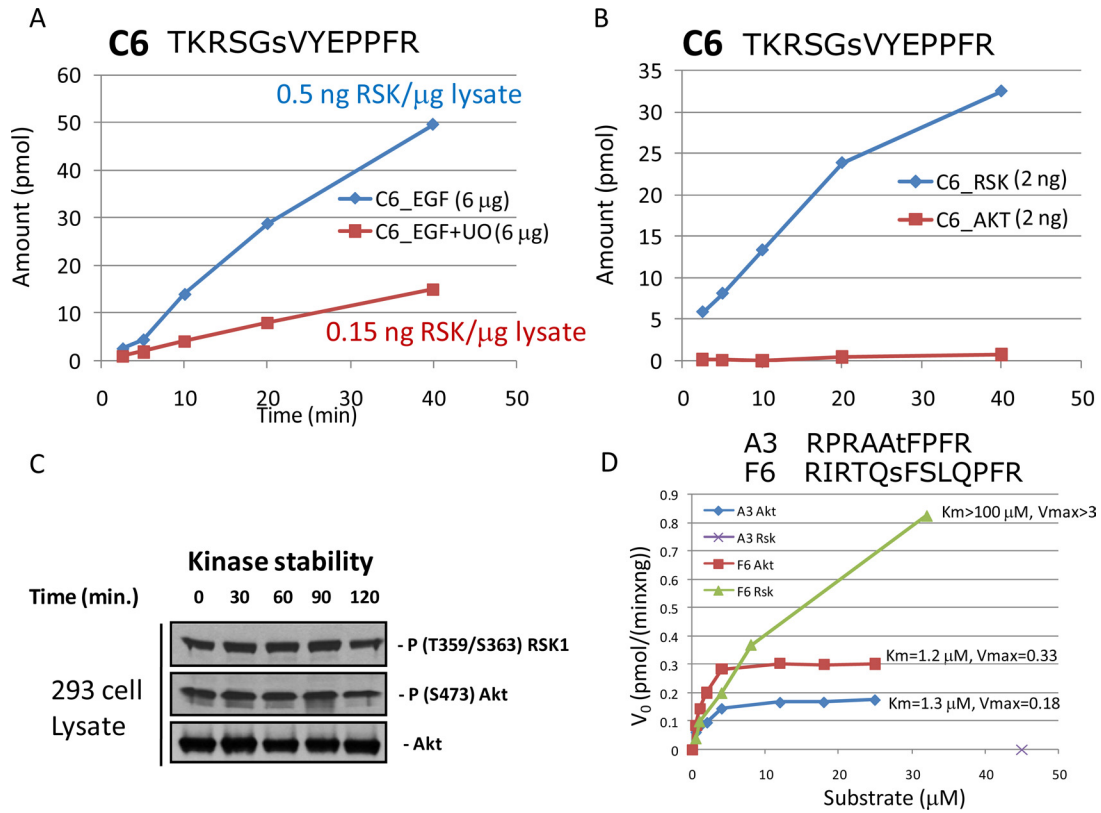

**Fig. S5.** Phosphorylation of peptides by cell lysates and purified kinases. (A) C6 was phosphorylated by EGF-stimulated HEK293 cell lysates and the lysates of HEK293 cells pretreated with UO126 and then stimulated with EGF. Reaction conditions were the same as those indicated in *Experimental Procedures*. From the data, we estimated the amount of active RSK present in these lysates. (B) C6 was phosphorylated in vitro using 2 ng of activated, purified Akt1 and RSK1. Reaction mixture was supplemented with 0.1% BSA. Other conditions were the same as in (A). (C) Western blot analysis of the lysates used in these KAYAK experiments. Kinase levels and phosphorylation states were stable in these reaction conditions. (D) Kinase specificity can be tuned by decreasing the reaction substrate concentration. F6 peptide is derived from a reported Akt site within nitric oxide synthase. We found that both Akt and RSK1 can phosphorylate this peptide using purified enzymes. The kinetics, however, were very different. RSK phosphorylation is preferred at concentrations  $>10 \mu\text{M}$  and Akt phosphorylation is preferred at  $<5 \mu\text{M}$ . A3 peptide is provided for comparison and is not phosphorylated by RSK1 (RSK1 is a serine-only kinase).

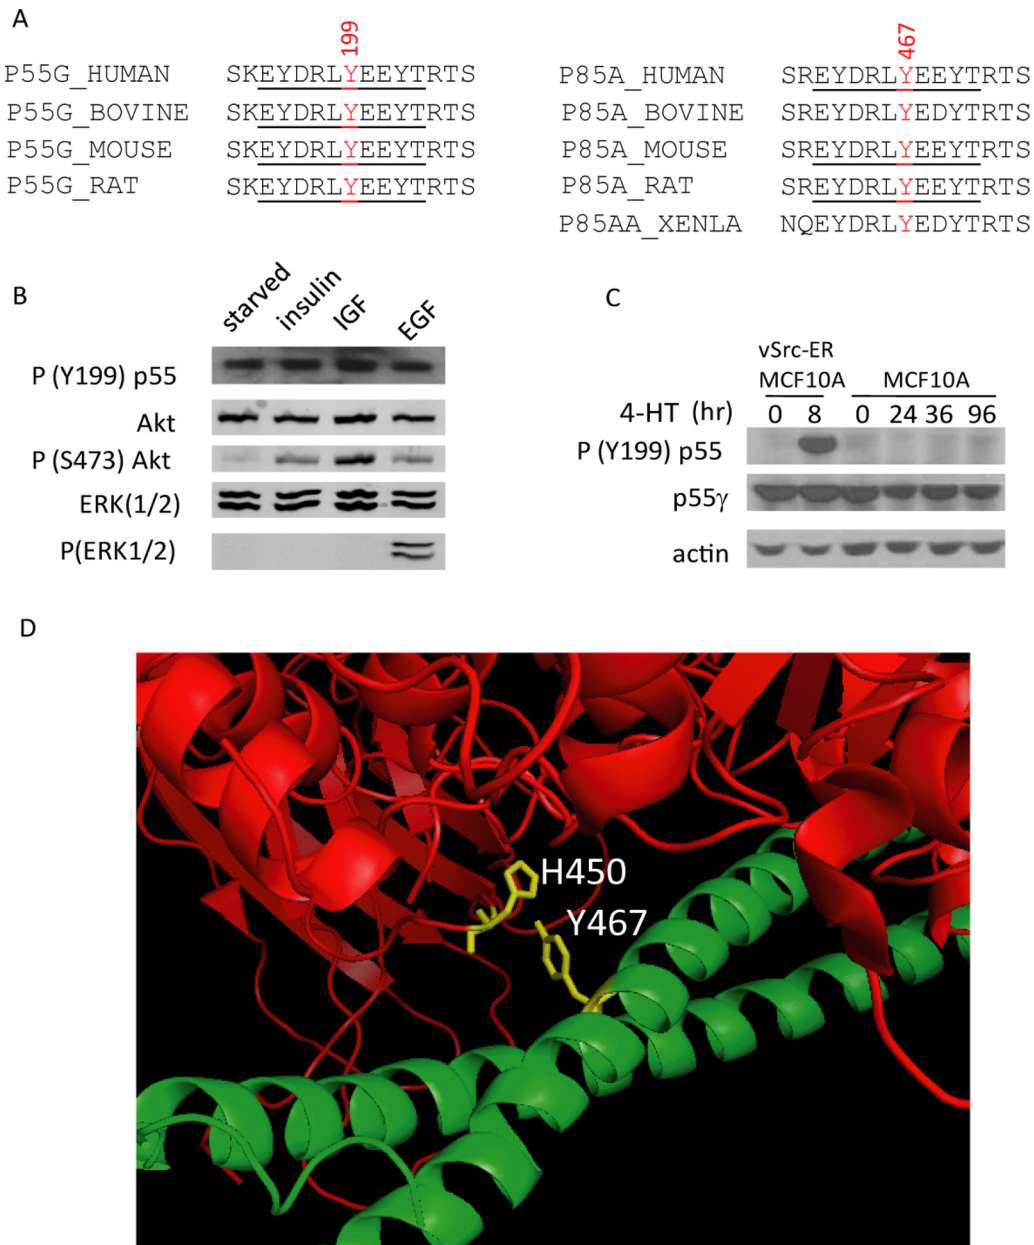

**Fig. S6.** Regulation of phosphorylation of p55 at Tyr-199. (A) Sequence alignment of the regulatory subunit of PI3K. Sequences corresponding to peptide H5 are underlined with the phosphorylated Tyr indicated in red. The sequences show high homology within different forms of the regulatory subunits among various species. (B) HEK293 cells were starved and stimulated with insulin, IGF, and EGF. Phospho-p55 (Tyr-199) levels were monitored using Western blotting analysis. (C) Phospho-p55 (Tyr-199) levels in MCF10A cells were not changed as a result of 4-HT treatment. MCF10A cells expressing ER:vSrc and MCF10A cells were treated with 1  $\mu$ M 4-HT for the indicated times. (D) Tyr-467/p85 $\alpha$  (correspondent of Tyr-199/p55 $\gamma$ ) is 2.7 Å away from His-450/p110 $\alpha$  in the crystal structure of PI-3 kinase, within the distance of potential hydrogen-bond formation (9). The structure was rendered with Pymol (The Pymol Molecular Graphics System). (Red) p110 $\alpha$  catalytic subunit and (green) p85 $\alpha$  regulatory subunit.



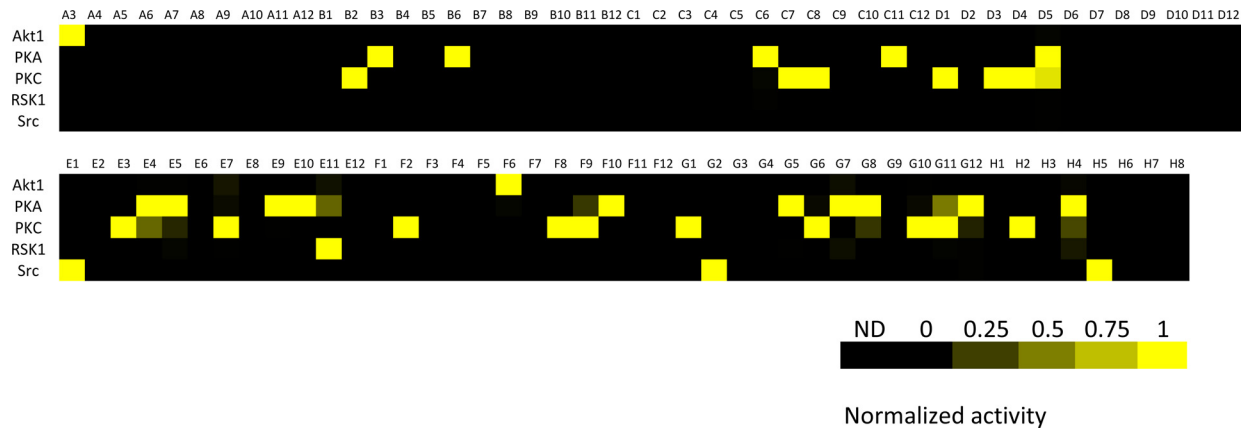

**Fig. S7.** Phosphorylation of the 90 KAYAK peptides in vitro using purified kinases. Two nanograms of kinase were used. Reaction conditions were the same as in Fig. S5. Activity of each peptide was normalized to the highest activity measured among the kinases examined (Akt1, PKA, PKC, RSK1, and Src). Highest activities of 2 fmol/ $\mu$ g/min were considered below detection threshold and shown as not detected (ND).

**Table S1. Sequences of the peptides used in the KAYAK assay**

| ID  | Substrate      | Internal standard <sup>a</sup> | Site | Category <sup>b</sup> | Swiss-Prot ID                  | Protein name                                                   | Potential kinase <sup>c</sup> | MH+ (Sub) | MH+ (IS) |
|-----|----------------|--------------------------------|------|-----------------------|--------------------------------|----------------------------------------------------------------|-------------------------------|-----------|----------|
| A3  | RPRAATFPFR     | RPRAATFPFR                     | t    | S/T(B)                | AKTIDE                         | aktide                                                         | Akt                           | 1218.685  | 1304.672 |
| A4  | GPLAGSPVIApFR  | GPLAGSPVIApFR                  | s    | S/T(P)                | SWISS;P19138;P20426;KC21_HUMAN | csnk2a1 protein                                                | CDK                           | 1281.731  | 1367.718 |
| A5  | LPGGSTPVSSpFR  | LPGGSTPVSSpFR                  | t    | S/T(P)                | SWISS;P19138;P20426;KC21_HUMAN | csnk2a1 protein                                                | CDK                           | 1301.685  | 1387.671 |
| A6  | RPGPQSPGSPpFR  | RPGPQSPGSPpFR                  | s    | S/T(P)                | SWISS;P14598;NCF1_HUMAN        | neutrophil cytosol factor 1                                    |                               | 1379.718  | 1465.704 |
| A7  | VGGAGYKQLpFR   | VGGAGYKQLpFR                   | y    | Y                     | SWISS;P42702;LIFR_HUMAN        | leukemia inhibitory factor receptor precursor                  |                               | 1389.764  | 1475.750 |
| A8  | GGVNVYSGLPpFR  | GGVNVYSGLPpFR                  | s    | S/T(O)                | SWISS;P40763;STAT3_HUMAN       | signal transducer and activator of transcription 3             |                               | 1391.707  | 1477.693 |
| A9  | EPLTPSGEAPPFR  | EPLTPSGEAPPFR                  | t    | S/T(P)                | SWISS;P00533;P06268;EGFR_HUMAN | epidermal growth factor receptor precursor                     |                               | 1397.706  | 1483.692 |
| A10 | TPPSAYGSVKpFR  | TPPSAYGSVKpFR                  | y    | Y                     | SWISS;P07355;ANX2_HUMAN        | annexin a2                                                     | Src                           | 1406.743  | 1492.729 |
| A11 | APKKGSKKAVpFR  | APKKGSKKAVpFR                  | s    | S/T(B)                | SWISS;P02278;H2B_HUMAN         | histone h2b                                                    | PKA                           | 1413.869  | 1499.855 |
| A12 | PSTNSPVLKpFR   | PSTNSPVLKpFR                   | s    | S/T(P)                | SWISS;E5PL1;E5PL1_HUMAN        | Separase                                                       | CDK                           | 1429.780  | 1515.766 |
| B1  | GSAAPYLKTKpFR  | GSAAPYLKTKpFR                  | y    | Y                     | SWISS;P40763;STAT3_HUMAN       | signal transducer and activator of transcription 3             |                               | 1435.806  | 1521.792 |
| B2  | KKASFKAKKpFR   | KKAsFKAKKpFR                   | s    | S/T(B)                | peptide KKASFKAKK              | peptide KKASFKAKK                                              | PKC                           | 1435.890  | 1521.876 |
| B3  | AKTRSSRAGLPpFR | AKTRSSRAGLPpFR                 | s    | S/T(B)                | SWISS;P02261;H2A1_HUMAN        | histone h2a                                                    | PKA                           | 1446.829  | 1532.815 |
| B4  | IPINGSPRTpFR   | IPINGSPRTpFR                   | s    | S/T(P)                | SWISS;P06400;RB_HUMAN          | retinoblastoma-associated protein                              | CDK                           | 1451.812  | 1537.798 |
| B5  | NQDPVPSLVpFR   | NQDPVPSLVpFR                   | s    | S/T(P)                | SWISS;P08172;ACM2_HUMAN        | muscarinic acetylcholine receptor m2                           | MAPK                          | 1455.759  | 1541.745 |
| B6  | PKRKVsSAEGpFR  | PKRKVsSAEGpFR                  | s    | S/T(B)                | SWISS;P05114;HMGN1_HUMAN       | nonhistone chromosomal protein hmg-14                          | RSK                           | 1458.818  | 1544.804 |
| B7  | VKRQSTPSApFR   | VKRQSTPSApFR                   | s    | S/T(B)                | SWISS;Q93100;PKBB_HUMAN        | phosphorylase b kinase regulatory subunit beta                 | CDK                           | 1460.797  | 1546.783 |
| B8  | TPSLPPTPRpFR   | TPSLPPTPRpFR                   | t    | S/T(P)                | SWISS;P10636;UPSP-TAU_HUMAN    | microtubule-associated protein tau                             |                               | 1466.811  | 1552.798 |
| B9  | RTPKDSPGIPpFR  | RTPKDSPGIPpFR                  | s    | S/T(P)                | SWISS;K56A1;RSK_HUMAN          | ribosomal protein s6 kinase alpha-1                            | ERK                           | 1467.807  | 1553.793 |
| B10 | TKRNSPPSPpFR   | TKRNSPPSPpFR                   | s    | S/T(P)                | SWISS;P20020;ATCP_HUMAN        | plasma membrane calcium-transporting atpase 1                  | PKA                           | 1470.781  | 1556.768 |
| B11 | LKLSPPSSRpFR   | LKLSPPSSRpFR                   | s    | S/T(P)                | SWISS;P20700;LAM1_HUMAN        | lamin-b1                                                       | CDK                           | 1471.838  | 1557.824 |
| B12 | VPPSPLSRHpFR   | VPPSPLSRHpFR                   | s    | S/T(O)                | SWISS;P13807;GYS1_HUMAN        | glycogen [starch] synthase                                     | CKI                           | 1476.807  | 1562.793 |
| C1  | PKGTGYIKTEpFR  | PKGTGYIKTEpFR                  | y    | Y                     | SWISS;P42224;STA1_HUMAN        | signal transducer and activator of transcription 1-alpha/beta  |                               | 1493.811  | 1579.797 |
| C2  | IPTGTPQRKpFR   | IPTGTPQRKpFR                   | t    | S/T(P)                | SWISS;P52732;EG5_HUMAN         | kinesin-like protein kif11 (kinesin-related motor protein eg5) | CDK                           | 1498.849  | 1584.835 |
| C3  | GLPKSYLPQTpFR  | GLPKSYLPQTpFR                  | y    | Y                     | SWISS;P40189;IL6RB_HUMAN       | interleukin-6 receptor beta chain precursor                    |                               | 1503.832  | 1589.818 |
| C4  | DSARVYENVGpFR  | DSARVYENVGpFR                  | y    | Y                     | SWISS;Q06124;PTNB_HUMAN        | tyrosine-protein phosphatase non-receptor type 11              |                               | 1509.744  | 1595.731 |
| C5  | LLKLASPELEpFR  | LLKLASPELEpFR                  | s    | S/T(P)                | SWISS;P05412;AP1_HUMAN         | transcription factor jun-d                                     | CDK                           | 1512.878  | 1598.865 |
| C6  | TKRSGSVYEPpFR  | TKRSGSVYEPpFR                  | s    | S/T(B)                | SWISS;Q93100;PKBB_HUMAN        | phosphorylase b kinase regulatory subunit beta                 | RSK                           | 1523.796  | 1609.783 |
| C7  | LKKLGSKKPQpFR  | LKKLGSKKPQpFR                  | s    | S/T(B)                | SWISS;Q9y5y9;SC10A_HUMAN       | sodium channel protein type 10 subunit alpha                   | PKC                           | 1526.953  | 1612.939 |
| C8  | GKAKVTGRWKpFR  | GKAKVTGRWKpFR                  | t    | S/T(B)                | SWISS;P45379;TNNT2_HUMAN       | troponin t                                                     | PKC                           | 1530.902  | 1616.888 |
| C9  | KKSKISASRKpFR  | KKSKISASRKpFR                  | s    | S/T(B)                | SWISS;P19429;TNNT3_HUMAN       | troponin i                                                     | PKC                           | 1532.938  | 1618.925 |
| C10 | AENAEYLVRVpFR  | AENAEYLVRVpFR                  | y    | Y                     | SWISS;P00533;EGFR_HUMAN        | epidermal growth factor receptor precursor                     |                               | 1535.796  | 1621.783 |
| C11 | NKRKRGSVLpFR   | NKRKRGSVLpFR                   | s    | S/T(B)                | SWISS;P16452;42_HUMAN          | erythrocyte membrane protein band 4.2                          | RSK                           | 1539.923  | 1625.909 |
| C12 | HLLAPSEEDHpFR  | HLLAPSEEDHpFR                  | s    | S/T(A)                | SWISS;P08833;IBP1_HUMAN        | insulin-like growth factor-binding protein 1 precursor         |                               | 1547.760  | 1633.747 |
| D1  | RKTTASTRKVPpFR | RKTTASTRKVPpFR                 | s    | S/T(B)                | SWISS;P13569;CFTR_HUMAN        | cystic fibrosis transmembrane conductance regulator            | PKC                           | 1547.913  | 1633.899 |
| D2  | APRRRSIRNPpFR  | APRRRSIRNPpFR                  | s    | S/T(B)                | SWISS;P14598;NCF1_HUMAN        | neutrophil cytosol factor 1                                    |                               | 1553.877  | 1639.864 |
| D3  | KLGSF5FKKpFR   | KLGSF5FKKpFR                   | s    | S/T(O)                | SWISS;P29966;MACS_HUMAN        | myristoylated alanine-rich c-kinase substrate                  | PKC                           | 1555.874  | 1641.861 |
| D4  | LKIQASFRGHpFR  | LKIQASFRGHpFR                  | s    | S/T(O)                | SWISS;Q92686; NEUG_HUMAN       | neurogranin                                                    | PKC                           | 1556.881  | 1642.867 |
| D5  | IKRFGSKAHLpFR  | IKRFGSKAHLpFR                  | s    | S/T(B)                | SWISS;P29475;NOS1_HUMAN        | nitric-oxide synthase, brain                                   | PKA                           | 1556.917  | 1642.904 |
| D6  | SPQPEYVNPpFR   | SPQPEYVNPpFR                   | y    | Y                     | SWISS;P04626;ERB2_HUMAN        | receptor tyrosine-protein kinase erbB-2                        |                               | 1558.765  | 1644.751 |
| D7  | NLLPLPEEPpFR   | NLLPLPEEPpFR                   | s    | S/T(P)                | SWISS;P42224;STA1_HUMAN        | signal transducer and activator of transcription 1-alpha/beta  | MAPK                          | 1558.826  | 1644.813 |
| D8  | LPVPEYINQSpFR  | LPVPEYINQSpFR                  | y    | Y                     | SWISS;P00533;P06268;EGFR_HUMAN | epidermal growth factor receptor precursor                     | EGFR                          | 1559.822  | 1645.808 |
| D9  | VKSRWVSGSQpFR  | VKSRWVSGSQpFR                  | s    | S/T(B)                | SWISS;P04049;KRAF_HUMAN        | raf proto-oncogene serine/threonine-protein kinase             | PKC                           | 1562.819  | 1648.805 |
| D10 | FKNIVTPRTpFR   | FKNIVTPRTpFR                   | t    | S/T(P)                | SWISS;P02686;MBP_HUMAN         | myelin basic protein                                           | CDK                           | 1572.901  | 1658.887 |
| D11 | REVGDYGLHHPpFR | REVGDYGLHHPpFR                 | y    | Y                     | SWISS;O60674;JAK2_HUMAN        | tyrosine-protein kinase jak2                                   |                               | 1573.787  | 1659.773 |
| D12 | RPQRATSNVFPpFR | RPQRATSNVFPpFR                 | t    | S/T(B)                | SWISS;P24844;MLRN_HUMAN        | myosin regulatory light chain 2                                |                               | 1575.850  | 1661.837 |
| E1  | EPEGDYEEVLPpFR | EPEGDYEEVLPpFR                 | y    | Y                     | SWISS;P14317;HS1_HUMAN         | hematopoietic lineage cell-specific protein                    |                               | 1579.727  | 1665.714 |
| E2  | FDDPSYVNVQpFR  | FDDPSYVNVQpFR                  | y    | Y                     | SWISS;P29353;SHC1_HUMAN        | shc-transforming protein 1                                     |                               | 1583.749  | 1669.735 |
| E3  | KRKQISVRGLpFR  | KRKQISVRGLpFR                  | s    | S/T(B)                | SWISS;P11217;PHS2_HUMAN        | glycogen phosphorylase                                         |                               | 1584.981  | 1670.967 |
| E4  | LLRGPWDPFPpFR  | LLRGPWDPFPpFR                  | s    | S/T(B)                | SWISS;P04792;HS27_HUMAN        | heat-shock protein beta-1                                      | MAPKAPK2                      | 1587.843  | 1673.829 |
| E5  | LKRSLSELEIPpFR | LKRSLSELEIPpFR                 | s    | S/T(B)                | SWISS;P11831;SRF_HUMAN         | serum response factor                                          |                               | 1587.922  | 1673.908 |
| E6  | PQEGLYNELQpFR  | PQEGLYNELQpFR                  | y    | Y                     | SWISS;P20963;CD3Z_HUMAN        | t-cell surface glycoprotein cd3 zeta chain precursor           | Lck/Fyn                       | 1590.791  | 1676.777 |
| E7  | LLRLF5FKAPPpFR | LLRLF5FKAPPpFR                 | s    | S/T(B)                | SWISS;Q6PCC3_HUMAN             | gamma-aminobutyric acid a receptor, gamma 2, isoform 1         | PKC                           | 1591.947  | 1677.934 |
| E8  | VQNPVYHNQpFR   | VQNPVYHNQpFR                   | y    | Y                     | SWISS;P00533;EGFR_HUMAN        | epidermal growth factor receptor precursor                     |                               | 1595.808  | 1681.794 |
| E9  | EKRKNsILNPpFR  | EKRKNsILNPpFR                  | s    | S/T(B)                | SWISS;P13569;CFTR_HUMAN        | cystic fibrosis transmembrane conductance regulator            | PKA                           | 1598.913  | 1684.899 |

| ID  | Substrate       | Internal standard <sup>a</sup> | Site | Category <sup>b</sup> | Swiss-Prot ID                  | Protein name                                                     | Potential kinase <sup>c</sup> | MH+ (Sub) | MH+ (IS) |
|-----|-----------------|--------------------------------|------|-----------------------|--------------------------------|------------------------------------------------------------------|-------------------------------|-----------|----------|
| E10 | AKKRLSVERIPFR   | AKKRLsVERIpFR                  | s    | S/T(B)                | SWISS;P11388;TOPA_HUMAN        | dna topoisomerase 2-alpha                                        | PKC                           | 1599.981  | 1685.967 |
| E11 | RKRLISSVEDPFR   | RKRLIsSVEDpFR                  | s    | S/T(B)                | SWISS;P49815;Tuberin_HUMAN     | tuberin                                                          | RSK, Akt                      | 1602.907  | 1688.894 |
| E12 | LFPRNYVTPVpFR   | LFPRNyVTPVpFR                  | y    | Y                     | SWISS;P62993;GRB2_HUMAN        | growth factor receptor-bound protein 2                           |                               | 1605.890  | 1691.876 |
| F1  | VRRFNTANDDPFR   | VRRFNtANDDpFR                  | t    | S/T(B)                | SWISS;P29474;NOS3_HUMAN        | nitric-oxide synthase,                                           |                               | 1607.804  | 1693.790 |
| F2  | KKGQESFKKQpFR   | KKGQEsFKKQpFR                  | s    | S/T(B)                | SWISS;P06748;NPM_HUMAN         | nucleophosmin                                                    | PKC                           | 1607.902  | 1693.888 |
| F3  | FLQRYSDPTpFR    | FLQRySDPTpFR                   | s    | S/T(A)                | SWISS;P00533;P06268;EGFR_HUMAN | epidermal growth factor receptor precursor                       |                               | 1613.807  | 1699.793 |
| F4  | RKLKDTDSEEPFR   | RKLKDtDSEEpFR                  | t    | S/T(A)                | SWISS;P02593;CALM_HUMAN        | calm1 protein                                                    | CKII                          | 1620.834  | 1706.820 |
| F5  | RTYSLGSALRPpFR  | RTYSLGsALRPpFR                 | s    | S/T(O)                | SWISS;P08670;VIME_HUMAN        | vimentin                                                         |                               | 1620.897  | 1706.883 |
| F6  | RIRTQSFSLQpFR   | RIRTQsFSLQpFR                  | s    | S/T(B)                | SWISS;P29474;NOS3_HUMAN        | nitric-oxide synthase                                            | RSK, Akt                      | 1635.908  | 1721.894 |
| F7  | EPENDYEDVEpFR   | EPENDyEDVEpFR                  | y    | Y                     | SWISS;P14317;HS1_HUMAN         | hematopoietic lineage cell-specific protein                      |                               | 1638.692  | 1724.678 |
| F8  | KPKDASQRRRpFR   | KPKDAsQRRRpFR                  | s    | S/T(B)                | SWISS;P12931;SRC_HUMAN         | proto-oncogene tyrosine-protein kinase src                       | PKC                           | 1641.941  | 1727.927 |
| F9  | LLELSRRRIPFR    | LLELSRRRipFR                   | s    | S/T(O)                | SWISS;P05198;IF2A_HUMAN        | eukaryotic translation initiation factor 2 subunit 1             |                               | 1642.986  | 1728.973 |
| F10 | KLRKVKQEEpFR    | KLRKVsQEEpFR                   | s    | S/T(B)                | SWISS;P50552;VASP_HUMAN        | vasodilator-stimulated phosphoprotein                            | PKA                           | 1644.954  | 1730.941 |
| F11 | RKGHEYTNIKpFR   | RKGHEyTNIKpFR                  | y    | Y                     | SWISS;Q06124;PTNB_HUMAN        | tyrosine-protein phosphatase non-receptor type 11                |                               | 1645.892  | 1731.879 |
| F12 | VKRRDYLDLAPFR   | VKRRDyLDLApFR                  | y    | Y                     | SWISS;P07949;RET_HUMAN         | proto-oncogene tyrosine-protein kinase receptor ret precursor    |                               | 1648.928  | 1734.915 |
| G1  | VLLRPSRRVpFR    | VLLRPsRRVpFR                   | s    | S/T(O)                | SWISS;P32745;SSR3_HUMAN        | somatostatin receptor type 3                                     |                               | 1652.034  | 1738.021 |
| G2  | ELQDDYEDLLPFR   | ELQDDyEDLLpFR                  | y    | Y                     | SWISS;P02730;B3AT_HUMAN        | band 3 anion transport protein                                   |                               | 1652.780  | 1738.767 |
| G3  | LDNPDYQDpFR     | LDNPdYQDpFR                    | y    | Y                     | SWISS;P00533;EGFR_HUMAN        | epidermal growth factor receptor precursor                       |                               | 1654.750  | 1740.736 |
| G4  | TDKEYYTVKDPFR   | TDKEyYTVKDPFR                  | y    | Y                     | SWISS;P23458;JAK1_HUMAN        | tyrosine-protein kinase jak1                                     |                               | 1661.817  | 1747.803 |
| G5  | SKRRNSEFEIPFR   | SKRRNsEFEIpFR                  | s    | S/T(B)                | SWISS;P17752;TPH1_HUMAN        | tryptophan 5-hydroxylase 1                                       | RSK                           | 1665.882  | 1751.868 |
| G6  | KKKKFSFKKpFR    | KKKKFsFKKpFR                   | s    | S/T(B)                | SWISS;P49006;MRP_HUMAN         | marks-related protein                                            | PKC                           | 1666.031  | 1752.018 |
| G7  | RKRRSSYHVpFR    | RKRRSsYHVpFR                   | s    | S/T(B)                | SWISS;Q99250;SCN2A_HUMAN       | sodium channel protein type 2 subunit alpha                      | PKA                           | 1675.925  | 1761.912 |
| G8  | FKRRSSKDTpFR    | FKRRSsKDTpFR                   | s    | S/T(B)                | SWISS;Q05586;P35437;NMZ1_HUMAN | glutamate [nmda] receptor subunit zeta 1 precursor               | PKC                           | 1680.940  | 1766.927 |
| G9  | FKNDKSKTWQpFR   | FKNDKsKTWQpFR                  | s    | S/T(B)                | SWISS;P06730;IF4E_HUMAN        | eukaryotic translation initiation factor 4e                      | PKA                           | 1681.881  | 1767.867 |
| G10 | KKKRFsFKKSpFR   | KKKRFsFKKSpFR                  | s    | S/T(B)                | SWISS;P29966;MARCS_HUMAN       | myristoylated alanine-rich c-kinase substrate                    | PKA                           | 1684.017  | 1770.003 |
| G11 | KKRRSRKESpFR    | KKRRRsRKESpFR                  | s    | S/T(B)                | SWISS;P02278;H2B_HUMAN         | histone h2b                                                      | PKC                           | 1703.030  | 1789.016 |
| G12 | IKKSWSRWTLpFR   | IKKSWsRWTLpFR                  | s    | S/T(B)                | SWISS;Q03431;PTHr1_HUMAN       | parathyroid hormone/parathyroid hormone-related peptide receptor |                               | 1704.970  | 1790.956 |
| H1  | HHIDYyKkTTPFR   | HHIDYyKkTTPFR                  | y    | Y                     | SWISS;P11362;FGFR1_HUMAN       | basic fibroblast growth factor receptor 1 precursor              |                               | 1705.881  | 1791.867 |
| H2  | WPWQVSLRTRpFR   | WPWQVsLRTRpFR                  | s    | S/T(O)                | SWISS;P00747;PLMN_HUMAN        | apolipoprotein                                                   |                               | 1728.944  | 1814.931 |
| H3  | HLEKKYVRRDPFR   | HLEKKyVRRDpFR                  | y    | Y                     | SWISS;P07333;CSF1R_HUMAN       | macrophage colony-stimulating factor 1 receptor precursor        | c-Fms                         | 1743.977  | 1829.963 |
| H4  | RLRRLsTKYRpFR   | RLRRLsTKYRpFR                  | s    | S/T(B)                | SWISS;Q05209;PTNC_HUMAN        | tyrosine-protein phosphatase non-receptor type 12                | PKA                           | 1749.051  | 1835.037 |
| H5  | EYDRLyEETpFR    | EYDRLyEETpFR                   | y    | Y                     | SWISS;P27986;P85A_HUMAN        | phosphatidylinositol 3-kinase regulatory subunit                 | Src                           | 1780.818  | 1866.804 |
| H6  | HTGFLTEyVATRpFR | HTGFLTEyVATRpFR                | y    | Y                     | SWISS;P28482;MK01_HUMAN        | mitogen-activated protein kinase 1                               | MEK                           | 1794.929  | 1960.881 |
| H7  | TSFLLTPyVVTRpFR | TSFLLTPyVVTRpFR                | y    | Y                     | SWISS;P45983;MK08_HUMAN        | mitogen-activated protein kinase 8                               |                               | 1797.006  | 1962.958 |
| H8  | IYKNDyYRKRpFR   | IYKNDyYRKRpFR                  | y    | Y                     | SWISS;P08922;ROS_HUMAN         | proto-oncogene tyrosine-protein kinase ros precursor             |                               | 1818.976  | 1904.963 |

<sup>a</sup>Lower case "p" indicates heavy Pro and lower cases s/t/y indicate phosphorylated Ser/Thr/Tyr residues, respectively.

<sup>b</sup>The 90 peptides were categorized into Ser/Thr-containing (S/T) or Tyr-containing (Y) peptides, with the S/T peptides further classified into different motif groups based on the following binary decision tree, P at + 1 (Pro-directed: P), 3 or more E/D at + 1 to + 4 (acidic: A), R/K at -3 (basic: B), D/E at + 1, + 2 or + 3 (A), 2 or more R/K at -5 to -1 (B), otherwise (O).

<sup>c</sup>Potential kinases were attributed based on Swissprot and literatures. IS, internal standard; Sub, substrate.

**Table S2. Examples of substrate peptide specificity for different cell states**

| ID  | Sequence       | Parent protein (Phosphorylation site)              | I <sup>a</sup> | E  | G1/S <sup>b</sup> | G2/M | Potential kinase |
|-----|----------------|----------------------------------------------------|----------------|----|-------------------|------|------------------|
| A3  | RPRAATFPFR     | Aktide <sup>c</sup>                                | ↑↑             | ↑  |                   |      | Akt              |
| A5  | LPGGStPVSSPFR  | casein kinase II subunit alpha (Thr344)            |                |    |                   | ↑    | CDK              |
| A12 | PSTNSsPVLKPFPR | separase (Ser1126)                                 |                |    |                   | ↑    | CDK              |
| B4  | IPINGsPRTPPFR  | retinoblastoma-associated protein (Ser249)         |                | ↑  |                   | ↑↑   | CDK              |
| B5  | NQDPVsPSLVPFPR | muscarinic acetylcholine receptor m2 (Ser232)      |                |    | ↓↓                | ↓    | MAPK             |
| B6  | PKRKVsSAEGPFR  | nonhistone chromosomal protein hmg-14 (Ser6)       |                | ↑  |                   | ↓    | RSK              |
| B11 | LKLSPsPSSRPFR  | lamin-b1 (Ser392)                                  |                |    | ↑                 | ↑↑   | CDK              |
| C2  | IPTGTtPQRKPFPR | kinesin-like protein kif11 (Thr927)                |                |    |                   | ↑↑   | CDK              |
| C6  | TKRSGsVVEPPFR  | phosphorylase b kinase regulatory subunit b(Ser26) |                | ↑  |                   | ↓    | RSK              |
| C11 | NKRRGsVPILPFPR | erythrocyte membrane protein band 4.2 (Ser247)     |                | ↑  |                   |      | RSK              |
| D7  | NLLPLsPEEFPFPR | STAT1 (Ser727)                                     |                |    | ↓↓                | ↓↓   | MAPK             |
| D10 | FKNIVtPRTPPFR  | myelin basic protein (Thr229)                      |                |    |                   | ↑↑   | CDK              |
| E10 | AKKRLsVERIPFR  | DNA topoisomerase 2-alpha (Ser29)                  |                | ↑  |                   |      | RSK              |
| E11 | RKRLIsSVEDPFPR | tuberin (Ser1798)                                  |                | ↑  |                   | ↓    | Akt, RSK         |
| F6  | RIRTQsFSLQPFR  | nitric-oxide synthase, endothelial (Ser1176)       | ↑              | ↑↑ |                   |      | Akt, RSK         |
| G5  | SKRRNsEFEIPFR  | tryptophan 5-hydroxylase 1 (Ser58)                 |                | ↑  |                   |      | RSK              |
| H5  | EYDRLyEEYTPFR  | PI3-kinase p85/p55 subunit (Tyr467/Tyr199)         |                |    |                   | ↑↑   | Src              |

<sup>a</sup>Peptides with changed phosphorylation in insulin- (I) and EGF- (E) stimulated conditions compared to starved HEK293 cells.

<sup>b</sup>Peptides with changed phosphorylation during G1/S and G2/M phases compared to asynchronously growing HeLa cells. A change of more than + 2-fold or -2-fold is indicated by "↑↑" or "↓↓", respectively. A change of more than + 4- or -4-fold is indicated by "↑↑↑" or "↓↓↓", respectively.

<sup>c</sup>Bozinovski S, Cristiano BE, Marmy-Conus N, Pearson RB (2002) The synthetic peptide RPRAATF allows specific assay of Akt activity in cell lysates. *Anal Biochem* 305:32–39.
